# Supplementary material for: A systematic review of the pathophysiology of 5-fluorouracil-induced cardiotoxicity
Source: PubMed Central journal article supplement (PMC4170068; doi:10.1186/2050-6511-15-47), 2014-09-04
Supplement: 2050-6511-15-47-S2.pdf [file 2050-6511-15-47-S2.pdf]

## Additional file 2: Characteristics and results of the studies

| Histopathological studies of the myocardium | Type of study | Model                                                                                                   | Parameters                                                                             | Effects                                                                                                                                                                                                                                                                                                                                                                                            | Proposed mechanisms                                    |
|---------------------------------------------|---------------|---------------------------------------------------------------------------------------------------------|----------------------------------------------------------------------------------------|----------------------------------------------------------------------------------------------------------------------------------------------------------------------------------------------------------------------------------------------------------------------------------------------------------------------------------------------------------------------------------------------------|--------------------------------------------------------|
| Kumar et al. <sup>2</sup>                   | In vivo       | Albino rats (50) (bolus 5-FU, 5-FU for 4 days, 5-FU for 7 days or 5-FU weekly for 3 weeks and controls) | Morphology                                                                             | Foci of myofibre necroses and inflammatory reaction<br>Multifocal hemorrhage, valvulitis and pericarditis<br>Vascular changes: dilated vessels, ruptured vascular wall, extravasation and microthromboses                                                                                                                                                                                          | Thrombosis                                             |
| Tsibiribi et al. <sup>3</sup>               | In vivo       | Rabbits (3x6: single high dose 5-FU, repeated dose 5-FU and controls)                                   | Morphology<br>Assessment of apoptosis                                                  | Single high iv dose: Massive hemorrhagic infarct of the ventricle walls, proximal spasms of the coronary arteries. Died within 1 day.<br>Repeated dose: left ventricular hypertrophy due to reticular interstitial or perivascular fibrosis with edema, concentric fibrous thickening of the intima of small distal coronary arteries, multifocal necrosis and disseminated foci of necrotic cells | Coronary artery spasm<br>Thrombosis                    |
| Histopathological studies of the arteries   | Type of study | Model                                                                                                   | Parameters                                                                             | Effects                                                                                                                                                                                                                                                                                                                                                                                            |                                                        |
| Kinhult et al. <sup>6</sup>                 | In vivo       | Rabbits (15 given 5-FU, 15 given dalteparin, 15 given 5-FU + dalteparin and 15 given saline)            | Endothelial morphology 1, 3, 7, 14 and 30 days after 5-FU injections                   | 5-FU only: pronounced injuries peaking on day 3, massive cell lysis, denuded areas, fibrin formation and substantial platelet aggregation<br>5-FU-dalteparin and the saline-dalteparin: less pronounced endothelial damage on day 3, diminished on day 7, but increasing again by day 14                                                                                                           | Endothelial injury<br>Thrombosis                       |
| Kinhult et al. <sup>7</sup>                 | In vivo       | Rabbits (15 5-FU, 15 saline, 15 probucol + 5-FU, 15 probucol + saline, 15 low dose probucol + 5-FU)     | Endothelial morphology 24 h, 3 days, 7 days, 14 days and 30 days after 5-FU injections | 5-FU only: Extensive cytolysis, denudation of the internal elastic lamina, platelet aggregation and fibrin formation<br>Probucol + 5-FU/saline and saline only group: Minor damage as endothelial cell contraction, vessel-wall contraction and villus formation                                                                                                                                   | Endothelial injury<br>Thrombosis                       |
| Cwikiel et al. <sup>4</sup>                 | In vivo       | Rabbits (6 5-FU intraperitoneally, 6 5-FU intra-arterially and 6 controls)                              | Morphology of the endothelium in small arteries                                        | Contracted vessel walls<br>Contracted and cytolytic endothelial cells<br>Cell detachment and denuded areas<br>Platelet accumulation and fibrin formation                                                                                                                                                                                                                                           | Artery contraction<br>Endothelial injury<br>Thrombosis |
| Cwikiel et al. <sup>5</sup>                 | In vivo       | Rabbits (15 5-FU intra-arterially and 5 controls)                                                       | Morphology of the endothelium in small arteries                                        | Contracted vessel walls<br>Contracted and cytolytic endothelial cells<br>Cell detachment and denuded areas<br>Platelet accumulation and fibrin formation                                                                                                                                                                                                                                           | Artery contraction<br>Endothelial injury<br>Thrombosis |

NOT = the results do not support the proposed mechanism

AOP = antioxidant potential; CAT = catalase; GSH-PX = glutathione peroxidase; MDA = malondialdehyde; NS = non-significant; SOD = superoxide dismutase; LVEF = left ventricular ejection fraction.

<sup>a</sup>Shear rate = the rate of change of velocity at which one layer of fluid passes over an adjacent layer.

Additional file 2: Characteristics and results of the studies *continued*

| Studies on cultured myocardial and endothelial cells              | Type of study | Model                                                                        | Parameters                                                                                                          | Effects                                                                                                                                                                                                                                                                                 | Proposed mechanisms                                 |
|-------------------------------------------------------------------|---------------|------------------------------------------------------------------------------|---------------------------------------------------------------------------------------------------------------------|-----------------------------------------------------------------------------------------------------------------------------------------------------------------------------------------------------------------------------------------------------------------------------------------|-----------------------------------------------------|
| Lamberti et al. <sup>8</sup>                                      | In vitro      | H9c2 rat cardiomyocytes treated with 5-FU +/- levofolene                     | Cell proliferation<br>Apoptosis<br>Oxidative stress (superoxide anion levels)                                       | Time- and dose-dependent growth inhibition potentiated by levofolene<br>Apoptosis potentiated by levofolene<br>Increased cleavage of caspase 3<br>Increased superoxide anion levels potentiated by levofolene<br>N-acetyl cysteine abrogated the apoptotic and oxidative stress effects | Oxidative stress                                    |
| Cwikiel et al. <sup>38</sup>                                      | In vitro      | Human endothelial cell line (HEC) and bovin endothelial cell line (BEC)      | DNA synthesis: ( <sup>3</sup> H)thymidine incorporation<br>Total cellular protein content<br>Prostaglandin release  | ( <sup>3</sup> H)thymidine incorporation decreased in HEC and BEC (HEC < BEC)<br>Total cellular protein content decreased in HEC and BEC<br>Prostaglandin release increased in HEC and BEC                                                                                              | -                                                   |
| Wenzel and Cosma <sup>10</sup>                                    | In vitro      | Beating myocytes, endothelial cells and fibroblasts from neonatal rat hearts | Metabolism (Quantitative metabolic inhibition test, QMIT)<br>Morphology                                             | Higher QMIT grades (i.e. less acid production) with increasing concentration of 5-FU<br>TC <sub>50</sub> values: Endothelial cells and fibroblasts 0.34 µg/ml and myocytes 3.25 µg/ml                                                                                                   | Increased metabolism                                |
| Studies of myocardial metabolism, function and antioxidant system | Type of study | Model                                                                        | Parameters                                                                                                          | Effects                                                                                                                                                                                                                                                                                 | Proposed mechanisms                                 |
| Matsubara et al. <sup>11</sup>                                    | In vivo       | Anesthetized open-chest guinea pigs (6x5)                                    | Myocardial blood flow<br>ECG and heart rate<br>Analysis of tricarboxylic acid cycle intermediates in excised hearts | ST changes on ECG, more animals affected at higher doses<br>No effect on blood pressure and heart rate<br>No changes in myocardial blood flow<br>Decrease in ATP and creatine phosphate levels<br>Accumulation of citrate                                                               | Myocardial ischemia not due to decreased blood flow |
| Tamatsu et al. <sup>12</sup>                                      | In vivo       | Open-chest and closed-chest anesthetized male guinea pigs                    | High energy phosphate compounds                                                                                     | More marked depletion of myocardial high energy phosphate compounds in open-chest animals than in closed-chest animals<br>Higher mortality in open-chest animals than in closed-chest animals                                                                                           | Increased metabolism                                |

NOT = the results do not support the proposed mechanism

AOP = antioxidant potential; CAT = catalase; GSH-PX = glutathione peroxidase; MDA = malondialdehyde; NS = non-significant; SOD = superoxide dismutase; LVEF = left ventricular ejection fraction.

<sup>a</sup>Shear rate = the rate of change of velocity at which one layer of fluid passes over an adjacent layer.

Additional file 2: Characteristics and results of the studies *continued*

|                                                |                      |                                                                                                         |                                                                                                      |                                                                                                                                                                                                                                                                                                                                                                                                                                                                              |                                                                                 |
|------------------------------------------------|----------------------|---------------------------------------------------------------------------------------------------------|------------------------------------------------------------------------------------------------------|------------------------------------------------------------------------------------------------------------------------------------------------------------------------------------------------------------------------------------------------------------------------------------------------------------------------------------------------------------------------------------------------------------------------------------------------------------------------------|---------------------------------------------------------------------------------|
| Millart et al. <sup>13</sup>                   | Ex vivo              | Isovolumic perfused rat heart                                                                           | Contractility<br>Oxygen consumption<br>Lactate release<br>Creatine kinase activity                   | Negative inotropic effect<br>Increased mean coronary flow<br>Increased oxygen consumption in pretreated rat hearts<br>No change in the ratio of oxygen consumption to rate-pressure product                                                                                                                                                                                                                                                                                  | Decreased contractility of the heart<br>Increased aerobic myocardial metabolism |
| Millart et al. <sup>16</sup>                   | Ex vivo              | Isovolumic perfused rat heart                                                                           | Magnesium, potassium, calcium, copper and iron contents<br>MDA levels                                | 20% higher iron levels in the 5-FU group<br>No differences for magnesium, potassium, calcium or copper<br>Lower alpha-hydroxybutyrate dehydrogenase leakage<br>Slightly higher MDA levels (NS)                                                                                                                                                                                                                                                                               | NOT electrolyte changes                                                         |
| Satoh et al. <sup>14</sup>                     | In vitro             | Isolated sinoatrial node and atrial preparation from mongrel puppies treated with 5-FU or ftorafur (15) | Action potential of the sinoatrial node cells<br>Atrial contraction                                  | Positive chronotropic and inotropic effect of 5-FU and ftorafur<br>No alterations of pindolol, verapamil, aminophylline and low Ca <sup>2+</sup> concentration on the positive responses of 5-FU and ftorafur                                                                                                                                                                                                                                                                | NOT decreased contractility of the heart.                                       |
| Durak et al. <sup>15</sup>                     | In vivo              | Female guinea pigs (5 receiving 5-FU for 5 days, 5 controls)                                            | SOD, GSH-PX and CAT activities<br>MDA, Fe and Cu levels<br>Antioxidant potential (AOP)<br>Morphology | Decreased activities of myocardial SOD and GSH-PX, elevated CAT activity<br>Higher MDA levels<br>Fall in AOP<br>No changes in Fe and Cu levels<br>No histopathological alterations                                                                                                                                                                                                                                                                                           | Decreased antioxidant capacity/oxidative stress<br>NOT ion changes              |
| <b>Studies of vasoconstriction of arteries</b> | <b>Type of study</b> | <b>Model</b>                                                                                            | <b>Parameters</b>                                                                                    | <b>Effects</b>                                                                                                                                                                                                                                                                                                                                                                                                                                                               | <b>Proposed mechanisms</b>                                                      |
| Mosseri et al. <sup>17</sup>                   | In vitro             | Aorta rings freshly isolated from rabbits treated with 5-FU (150)                                       | Vasoconstriction/isometric tension                                                                   | Concentration-dependent vasoconstriction<br>No alteration in ACh-induced endothelium-dependent relaxation<br>A protein kinase C inhibitor reduced 5-FU-induced vasoconstriction<br>An activator of protein kinase C increased 5-FU-induced vasoconstriction<br>Glycerolnitrate abolished 5-FU-induced vasoconstriction<br>No effect of an inhibitor of phosphoinositide turnover, a cyclooxygenase inhibitor and membrane receptor blockers on 5-FU-induced vasoconstriction | Arterial vasoconstriction leading to myocardial ischemia                        |

NOT = the results do not support the proposed mechanism

AOP = antioxidant potential; CAT = catalase; GSH-PX = glutathione peroxidase; MDA = malondialdehyde; NS = non-significant; SOD = superoxide dismutase; LVEF = left ventricular ejection fraction.

<sup>a</sup>Shear rate = the rate of change of velocity at which one layer of fluid passes over an adjacent layer.

Additional file 2: Characteristics and results of the studies *continued*

|                                 |                      |                                                                                                            |                                                                                                      |                                                                                                                                                                                                                                                                                                                                        |                                                                                       |
|---------------------------------|----------------------|------------------------------------------------------------------------------------------------------------|------------------------------------------------------------------------------------------------------|----------------------------------------------------------------------------------------------------------------------------------------------------------------------------------------------------------------------------------------------------------------------------------------------------------------------------------------|---------------------------------------------------------------------------------------|
| Südhoff et al. <sup>19</sup>    | Human                | Malignant tumors<br>Treatment with 5-FU<br>(30 + 30 controls)                                              | Brachial artery diameter (high resolution ultrasound)<br>Plasma concentrations of big endothelin     | Contraction of the brachial artery in 15 of 30 patients<br>Vasoconstriction more prevalent with infusional FU (66%) than bolus application (44%)<br>Reoccurrence of vasoconstriction in 86% of repeated administrations<br>Glyceroltrinitrate prevented vasoconstriction<br>Trend towards increased big endothelin plasma levels       | Arterial vasoconstriction leading to myocardial ischemia                              |
| Salepci et al. <sup>18</sup>    | Human                | Gastric or colon cancer<br>Treatment with 5-FU + leucovorin (31). Controls received non-5-FU regimens (28) | Brachial artery diameters<br>Angiotensin II and TnT assays                                           | Decrease in brachial artery diameters<br>No change in angiotensin II and TnT levels                                                                                                                                                                                                                                                    | Arterial vasoconstriction leading to myocardial ischemia, not angiotensin II mediated |
| <b>Studies on RBCs</b>          | <b>Type of study</b> | <b>Model</b>                                                                                               | <b>Parameters</b>                                                                                    | <b>Effects</b>                                                                                                                                                                                                                                                                                                                         | <b>Proposed mechanisms</b>                                                            |
| Spasojevic et al. <sup>21</sup> | In vitro             | RBCs incubated in 5-FU                                                                                     | RBC morphology<br>Potassium efflux<br>Level of hemolysis<br>RBC membrane fluidity                    | Exposure-time/dose-dependent transformation of RBCs into echinocytic shape<br>Increased K <sup>+</sup> efflux from RBCs into plasma<br>Decreased intracellular ATP levels<br>Membrane fluidity at concentrations of 10 mg/ml 5-FU                                                                                                      | Alterations in RBCs leading to decreased oxygen transfer to the heart                 |
| Spasojevic et al. <sup>22</sup> | In vitro             | Blood incubated in 5-FU                                                                                    | <i>pO2</i><br>ATP and 2,3-BPG levels in RBCs                                                         | <i>pO2</i> in RBCs declined<br>2,3-BPG concentration in RBCs increased<br>Decreased ATP in RBCs                                                                                                                                                                                                                                        | Alterations in RBCs leading to decreased oxygen transfer to the heart                 |
| Spasojevic et al. <sup>23</sup> | In vitro and human   | Blood incubated in 5-FU<br>Patients treated with 5-FU and cisplatin (5)                                    | <i>pO2</i><br>ATP and 2,3-BPG levels in RBCs<br>31P NMR spectroscopy                                 | Transformation of RBCs into echinocytic shape<br>Increased membrane fluidity<br>Decrease of <i>pO2</i><br>Increased 2,3-BPG<br>Decreased ATP<br>Downfield shift in 31P-NMR spectra of blood samples (NS)                                                                                                                               | Alterations in RBCs leading to decreased oxygen transfer to the heart                 |
| Baerlocher et al. <sup>20</sup> | In vitro             | Blood incubated in 5-FU                                                                                    | RBC morphology<br>Blood viscosity<br>Biophysical properties of RBCs and polymorph nuclear leucocytes | Dose-dependent, reversible echinocytic shape transformation of RBCs<br>Dose-dependent decrease in blood viscosity at low shear rates <sup>a</sup> and increase at high shear rates<br>No effect on plasma viscosity<br>Decreased RBC aggregation at high 5-FU concentrations (10 mg/ml)<br>Impaired transit of RBCs through 5 µm pores | Alterations in RBCs leading to decreased oxygen transfer to the heart                 |

NOT = the results do not support the proposed mechanism

AOP = antioxidant potential; CAT = catalase; GSH-PX = glutathione peroxidase; MDA = malondialdehyde; NS = non-significant; SOD = superoxide dismutase; LVEF = left ventricular ejection fraction.

<sup>a</sup>Shear rate = the rate of change of velocity at which one layer of fluid passes over an adjacent layer.

Additional file 2: Characteristics and results of the studies *continued*

|                                                          |                      |                                                                                                                                                             |                                                                                                                                                                       |                                                                                                                                                                                                                                                                                                                                        |                                                                                     |
|----------------------------------------------------------|----------------------|-------------------------------------------------------------------------------------------------------------------------------------------------------------|-----------------------------------------------------------------------------------------------------------------------------------------------------------------------|----------------------------------------------------------------------------------------------------------------------------------------------------------------------------------------------------------------------------------------------------------------------------------------------------------------------------------------|-------------------------------------------------------------------------------------|
| Cwikiel et al. <sup>24</sup>                             | Human                | Male, squamous cell carcinomas Treatment with 5FU (11)                                                                                                      | Blood viscosity<br>Plasma viscosity<br>Fibrinogen<br>Hemotocrit                                                                                                       | Blood viscosity decreased<br>Plasma viscosity decreased<br>Fibrinogen values decreased<br>Correlation between blood viscosity and fibrinogen level before and during infusion                                                                                                                                                          | NOT increased blood viscosity leading to thrombosis                                 |
| <b>Studies of substances in blood samples from human</b> | <b>Type of study</b> | <b>Model</b>                                                                                                                                                | <b>Parameters</b>                                                                                                                                                     | <b>Effects</b>                                                                                                                                                                                                                                                                                                                         | <b>Proposed mechanisms</b>                                                          |
| Kuzel et al. <sup>25</sup>                               | Human                | Patients with head and neck or gastrointestinal cancers treated with 5-FU +/- cisplatin (10)                                                                | Fibrinopeptide A (FpA)<br>Protein C activity (PCa)<br>Protein C (PCag)<br>Free protein S antigen                                                                      | Rise in FpA activation during infusion<br>A reduction in PCa compared to PCag after infusion                                                                                                                                                                                                                                           | -                                                                                   |
| Thyss et al. <sup>28</sup>                               | Human                | Cancer patients (8 with 5-FU induced cardiotoxicity, 8 5-FU-treated without cardiotoxicity, 8 treated with other chemotherapeutics and 30 healthy controls) | Endothelin-1                                                                                                                                                          | Higher plasma endothelin-1 levels in patients treated with 5-FU<br>Even higher plasma endothelin-1 levels in patients with 5-FU cardiotoxicity                                                                                                                                                                                         | Increased endothelin-1 leading to arterial vasoconstriction and myocardial ischemia |
| Jensen et al. <sup>26, 27</sup>                          | Human                | Patients with colorectal cancer treated with 5-FU + oxaliplatin (106)                                                                                       | NT-proBNP<br>Lactic acid<br>Plasma von Willebrand factor (vWF)<br>Urine albumin-creatinine ratio (UACR)<br>Coagulation factor II, VII and X<br>Fibrin D-dimer<br>LVEF | Increased NT-proBNP and plasma lactic acid<br>Higher NT-proBNP levels in patients with cardiotoxicity<br>Increased vWF, UACR and fibrin D-dimer<br>Decreased coagulation factor activity<br>No differences in vWF, UACR, coagulations factors and fibrin D-dimer between patients with or without cardiotoxicity<br>No changes in LVEF | NOT thrombosis.<br>NOT decreased cardiac pump function                              |

NOT = the results do not support the proposed mechanism

AOP = antioxidant potential; CAT = catalase; GSH-PX = glutathione peroxidase; MDA = malondialdehyde; NS = non-significant; SOD = superoxide dismutase; LVEF = left ventricular ejection fraction.

<sup>a</sup>Shear rate = the rate of change of velocity at which one layer of fluid passes over an adjacent layer.
